# Supplementary material for: Predicting Harmful Algal Blooms and Impacts on Shellfish Mariculture using Novel Data-Driven Approaches
Source: Research Square preprint supplement (doi:10.21203/rs.3.rs-668820/v1), 2021-07-15
Supplement: Supplementary file 1 [file 868efa36a7d3ef0b9544fbee.xlsx]

## Sheet: Summary
Summary of data used for spatiotemporal modelling
Definitions
n	Number of data points
n_sites	Number of harvesting sites
n_species	Number of species
region	n	n_sites	n_species
France	12081	207	17
Scotland	13638	73	5
SW England	2886	22	5
Summary of data used for forecasting
Definitions
n_toxin	Number of toxin data points used for modelling (including training and test data)
n_phyto	Number of phytoplankton abundance data points used as inputs for modelling.
site	n_toxin	n_phyto
St Austell Bay	195	205
Fowey	175	207
Lyme Bay	88	103
Loch Eishort	211	224
Loch Laxford	163	174
Sandsound Voe	202	159
